# Supplementary material
Source: Research Square preprint supplement (doi:10.21203/rs.3.rs-10239680/v1)
Supplement: Supplementary file 1 [file 28116101fa40a3adeca1f308.docx]

**Supplementary File 1**

**English-Language Questionnaire and Assessment Protocol**

*When Protection Does Not Attach: Caregiver Continuity, Temperamental Susceptibility, and Attachment Disorder Symptoms among Children in Alternative Care in China*

Author: Ruohan Xu

**Instrument status and scope**

The study used a mixed assessment battery rather than one previously published questionnaire. This document presents the study-developed forms and coding protocols and summarizes the administration and scoring of published measures adapted for the study. Published source measures are cited below. The wording should be checked against the original Chinese instruments, translation records, and field coding manual before submission.

| **Author-verification notice** |
| --- |
| This English-language document was reconstructed from the submitted manuscript. It must not be represented as the exact field instrument unless the author confirms that every item, response option, administration rule, and scoring instruction matches the materials actually approved and used in the study. |

| **Safeguarding and administration** |
| --- |
| Assessments were administered by trained staff using trauma-informed procedures. Legal guardian consent, caregiver consent, and developmentally appropriate child assent were obtained as applicable. The frustration and stranger-approach tasks were stopped immediately if the child showed distress. No task encouraged a child to leave a safe setting with an unfamiliar adult. |

# 1. Assessment schedule

| **Source** | **T1 baseline** | **T2 (6 months)** | **T3 (12 months)** |
| --- | --- | --- | --- |
| Caregiver interview/questionnaire | Care type; placement and adversity history; baseline RAD/DSED; temperament; caregiver and household covariates | Caregiver continuity; caregiver changes; caregiver stress/context | RAD/DSED; secondary socioemotional adjustment |
| Administrative/case records | Placement dates; reason for care; age at entry; prior adversity; disability; site and region | Caregiver assignment, staff turnover, weekly hours, and placement changes | Placement and service updates |
| Observed interaction | Not primary | Free play and mild frustration/comfort-seeking task; caregiver sensitivity coding | Not primary |
| Stranger-approach observation | Baseline where ethically appropriate | Optional validation | Outcome validation where ethically appropriate |

# 2. General response anchors

- Agreement/frequency questionnaire items: 1 = Never or not at all true, 2 = Rarely, 3 = Sometimes, 4 = Often, 5 = Almost always or very true, unless another response format is shown.
- RAD/DSED interview items: 0 = symptom absent, 1 = occasional or mild, 2 = persistent or clearly present. Higher totals indicate more symptoms.
- Observed caregiver sensitivity domains: 1 = very low, 2 = low, 3 = mixed/adequate, 4 = high, 5 = consistently high.
- Items and domains were scored only when the relevant interaction or caregiving context could be observed reliably.

# 3. Study-developed care-context and placement-history form (T1)

| **Code** | **Item / field** | **Administration** |
| --- | --- | --- |
| CP1 | Current care context: institutional care / family-like group care / formal foster care / kinship care / low-SES community family | Caregiver and records |
| CP2 | Child date of birth and age at assessment (months) | Records |
| CP3 | Date and age at first entry into the current care arrangement | Records |
| CP4 | Total duration in alternative care (months) | Records |
| CP5 | Number of placement moves since first separation from the birth family | Records |
| CP6 | Number of caregiver changes during the past six months | Records/caregiver |
| CP7 | Primary reason for placement, recorded only when ethically and legally available | Records; broad categories only |
| CP8 | Child disability or developmental condition documented: no / yes / unknown | Records/caregiver |
| CP9 | Rural/urban location and study region | Records |
| CP10 | Caregiver education and household/institutional socioeconomic resources | Caregiver/site record |

**Response/scoring:** Record factual values or select the applicable category. The absence of recorded adversity must be coded as unknown rather than evidence that adversity did not occur.

# 4. Pre-placement adversity abstraction form (T1)

| **Code** | **Item / field** | **Administration** |
| --- | --- | --- |
| PA1 | Documented physical neglect or inadequate supervision | 0 = not documented; 1 = possible/uncertain; 2 = clearly documented |
| PA2 | Documented emotional neglect or prolonged absence of responsive caregiving | 0-2 |
| PA3 | Documented physical abuse | 0-2 |
| PA4 | Documented exposure to domestic or community violence | 0-2 |
| PA5 | Parental death, disappearance, imprisonment, severe illness, or incapacity | 0-2 |
| PA6 | Severe material deprivation or homelessness | 0-2 |
| PA7 | Repeated separation, abandonment, or disrupted caregiving before the current placement | 0-2 |

**Response/scoring:** Sum only documented indicators according to the approved coding manual. Missing or unavailable records remain missing and are not scored as zero.

# 5. Caregiver continuity questionnaire and record indicators (T2)

## 5.1 Record-based indicators

| **Code** | **Item / field** | **Administration** |
| --- | --- | --- |
| CC-R1 | Number of adults serving as primary caregivers during the past month | Administrative record |
| CC-R2 | Number of caregiver changes during the past six months | Administrative record |
| CC-R3 | Number of placement moves during the past six months | Administrative record |
| CC-R4 | Average weekly hours spent with the main caregiver | Record/caregiver estimate |
| CC-R5 | Staff turnover rate in the child's unit during the past six months | Site record; institutional/group care |
| CC-R6 | A formally assigned key caregiver is present: no / yes | Site record |
| CC-R7 | The same caregiver is usually available at bedtime, during illness, and after distress: no / partly / yes | Record/caregiver |

**Response/scoring:** Indicators were standardized before combination. Values were oriented so that higher scores represented greater continuity.

## 5.2 Caregiver-report continuity items

| **Code** | **Item / field** | **Administration** |
| --- | --- | --- |
| CC-Q1 | The child has one adult whom the child clearly prefers when upset or in need of help. | Caregiver report |
| CC-Q2 | The same familiar adult is usually available when the child becomes distressed. | Caregiver report |
| CC-Q3 | Daily caregiving routines are predictable for this child. | Caregiver report |
| CC-Q4 | The child knows who will care for them across ordinary daily transitions. | Caregiver report |
| CC-Q5 | Unexpected changes in the child's main caregiver are uncommon. | Caregiver report |

**Response/scoring:** 1 = Never/not true to 5 = Almost always/very true. Higher scores indicate greater continuity.

# 6. Caregiver sensitivity observation schedule (T2)

The study-developed observation protocol included a brief free-play episode and a mild frustration or comfort-seeking episode. The task was designed to elicit ordinary caregiving responses without exposing children to undue distress. Each domain was rated from 1 to 5 by trained coders who were blind to the primary outcome scores whenever feasible.

| **Code** | **Item / field** | **Administration** |
| --- | --- | --- |
| CS-O1 | Promptness: speed and appropriateness of response after a clear child signal | 1 = consistently delayed/absent; 3 = mixed; 5 = prompt and well-timed |
| CS-O2 | Warmth: affectionate tone, positive regard, and emotional availability | 1 = cold/negative; 3 = neutral/mixed; 5 = consistently warm |
| CS-O3 | Accurate interpretation: caregiver identifies the child's likely need or emotion correctly | 1 = frequently misreads; 3 = partly accurate; 5 = consistently accurate |
| CS-O4 | Non-intrusiveness: support is offered without controlling, overwhelming, or interrupting the child unnecessarily | 1 = highly intrusive/withdrawn; 3 = mixed; 5 = well calibrated |
| CS-O5 | Affective attunement: caregiver matches and helps regulate the child's emotional state | 1 = poorly attuned; 3 = intermittent; 5 = consistently attuned |
| CS-O6 | Support for exploration: caregiver provides a secure base while allowing age-appropriate autonomy | 1 = restricts/ignores; 3 = adequate; 5 = consistently supportive |

**Response/scoring:** Average the six domain ratings when at least four domains are scorable. Double-code the prespecified reliability subset and calculate the intraclass correlation coefficient.

## 6.1 Episode structure and stopping rules

- Free play: approximately 5 minutes with age-appropriate toys; caregiver instructed to interact as usual.
- Mild frustration/comfort-seeking episode: approximately 2-3 minutes using a developmentally appropriate, low-intensity challenge or brief interruption of access to a desired toy.
- The caregiver could comfort the child at any time. The episode stopped immediately if the child showed sustained distress, freezing, panic, or a clear wish to stop.
- Coders recorded protocol deviations, task duration, visibility of child and caregiver behavior, and whether a domain was not scorable.

# 7. Adapted caregiver interview for RAD and DSED symptoms (T1 and T3)

The interview domains were adapted from the Disturbances of Attachment Interview and relevant clinical guidance (Smyke et al., 2002; Zeanah & Gleason, 2015). The prompts below are an English-language item map, not a clinical diagnostic interview. The study reports symptom scores rather than diagnoses.

## 7.1 RAD symptom items

| **Code** | **Item / field** | **Administration** |
| --- | --- | --- |
| RAD1 | The child rarely or inconsistently seeks comfort from a familiar caregiver when distressed. | Caregiver interview; 0-2 |
| RAD2 | The child shows little response to comfort offered by a familiar caregiver. | Caregiver interview; 0-2 |
| RAD3 | The child shows limited preference for a specific familiar caregiver over other available adults. | Caregiver interview; 0-2 |
| RAD4 | The child is emotionally withdrawn or minimally responsive during ordinary interaction with familiar caregivers. | Caregiver interview; 0-2 |
| RAD5 | The child shows limited positive affect or social reciprocity with familiar caregivers. | Caregiver interview; 0-2 |

**Response/scoring:** Sum five items for a 0-10 symptom score. Higher scores indicate more RAD symptoms.

## 7.2 DSED symptom items

| **Code** | **Item / field** | **Administration** |
| --- | --- | --- |
| DSED1 | The child approaches unfamiliar adults with unusually little hesitation. | Caregiver interview; 0-2 |
| DSED2 | The child uses overly familiar verbal or physical behavior with unfamiliar adults. | Caregiver interview; 0-2 |
| DSED3 | The child checks back with the familiar caregiver less than expected after moving away in an unfamiliar setting. | Caregiver interview/observation; 0-2 |
| DSED4 | The child appears willing to leave a safe setting with an unfamiliar adult with little or no hesitation. | Caregiver interview/ethical observation; 0-2 |
| DSED5 | The child shows little differentiation between familiar caregivers and unfamiliar adults in social approach. | Caregiver interview; 0-2 |

**Response/scoring:** Sum five items for a 0-10 symptom score. Higher scores indicate more DSED symptoms.

# 8. Stranger-approach observation checklist

| **Safety limitation** |
| --- |
| The task assessed social approach only under close supervision. The unfamiliar adult never removed the child from the observation area, and no task was conducted when the research team or caregiver judged it unsuitable. |

| **Code** | **Item / field** | **Administration** |
| --- | --- | --- |
| SA1 | Latency before approaching the unfamiliar adult | Record seconds or protocol category |
| SA2 | Reticence or checking behavior before approach | 0 = age-appropriate; 1 = reduced; 2 = markedly reduced |
| SA3 | Overly familiar verbal behavior | 0-2 |
| SA4 | Overly familiar physical proximity or contact | 0-2 |
| SA5 | Checks back visually or physically with the familiar caregiver | 0 = frequent/appropriate; 1 = limited; 2 = absent |
| SA6 | Behavior in response to an invitation to move a short distance within the safe observation area | 0 = refuses/checks; 1 = hesitant; 2 = readily follows |
| SA7 | Protocol deviation, distress, or early termination | No / yes; describe without identifiers |

**Response/scoring:** Use for convergent validation only. Do not interpret the observation as a stand-alone diagnosis.

# 9. Temperament caregiver form (T1)

Items were adapted and paraphrased from age-appropriate Early Childhood Behavior Questionnaire and Children's Behavior Questionnaire dimensions (Putnam et al., 2006; Rothbart et al., 2001). Caregivers rated the child's typical behavior during the preceding six months.

## 9.1 Negative emotionality/frustration

| **Code** | **Item / field** | **Administration** |
| --- | --- | --- |
| NE1 | The child becomes upset quickly when an activity is interrupted. | 1-5 |
| NE2 | The child reacts strongly when unable to obtain something desired. | 1-5 |
| NE3 | The child remains distressed for a long time after becoming upset. | 1-5 |
| NE4 | The child is easily frightened by unfamiliar situations or people. | 1-5 |
| NE5 | The child shows intense anger or frustration during ordinary limits and transitions. | 1-5 |
| NE6 | Small changes in routine often lead to visible distress. | 1-5 |

**Response/scoring:** Mean the items; higher scores indicate greater negative emotionality.

## 9.2 Effortful control

| **Code** | **Item / field** | **Administration** |
| --- | --- | --- |
| EC1 | The child can focus on a quiet activity for an age-appropriate period. | 1-5 |
| EC2 | The child can wait briefly when asked. | 1-5 |
| EC3 | The child can stop an activity when a familiar caregiver gives a clear instruction. | 1-5 |
| EC4 | The child can shift attention from one activity to another without prolonged distress. | 1-5 |
| EC5 | The child can calm down with ordinary caregiver support. | 1-5 |
| EC6 | The child can follow simple rules even when excited. | 1-5 |

**Response/scoring:** Mean the items; higher scores indicate greater effortful control.

## 9.3 Perceptual sensitivity

| **Code** | **Item / field** | **Administration** |
| --- | --- | --- |
| PS1 | The child notices small changes in the room or surroundings. | 1-5 |
| PS2 | The child notices subtle changes in another person's voice or facial expression. | 1-5 |
| PS3 | The child reacts to quiet sounds, textures, or details that others may not notice. | 1-5 |
| PS4 | The child quickly detects when a familiar routine is slightly different. | 1-5 |

**Response/scoring:** Mean the items; higher scores indicate greater perceptual sensitivity.

# 10. Published secondary measures

The following previously published measures were identified and cited in the manuscript. Their official or licensed wording is not reproduced here. The study-specific administration record should identify the language version, translation procedure, respondent, wave, and scoring rule actually used.

| **Code** | **Item / field** | **Administration** |
| --- | --- | --- |
| PM1 | Disturbances of Attachment Interview domains for RAD and DSED symptoms | Smyke et al. (2002); adapted caregiver interview |
| PM2 | Early Childhood Behavior Questionnaire / Children's Behavior Questionnaire temperament dimensions | Putnam et al. (2006); Rothbart et al. (2001) |
| PM3 | Strengths and Difficulties Questionnaire for secondary emotional, conduct, peer, and prosocial outcomes | Goodman (1997) |

**Response/scoring:** Use the validated or authorized version and the scoring rules documented in the study protocol.

# 11. Scoring and data-quality rules

1. Caregiver continuity: standardize the record-based and caregiver-report indicators, reverse instability indicators, and combine them so that higher values indicate greater continuity. Retain component indicators for sensitivity analyses.
2. Caregiver sensitivity: average scorable domain ratings. Report inter-rater reliability from the double-coded subset and repeat analyses excluding recordings with major protocol deviations.
3. RAD and DSED: compute separate symptom scores. Do not combine the two disorders into one total and do not label scores as clinical diagnoses.
4. Temperament: calculate dimension means after applying any source-measure reverse scoring documented in the original protocol. Negative emotionality and effortful control are the primary moderators.
5. Missing data: do not replace unavailable child-welfare records with zero. Preserve distinctions among absent, unknown, not applicable, and not assessed.
6. Translation: retain the forward translation, back-translation, specialist review, pilot-testing record, and the final approved Chinese wording with the study archive.
7. Confidentiality: exclude names of institutions, local sites, children, caregivers, and case identifiers from the research dataset and supplementary materials.

# 12. Source references

Goodman, R. (1997). The Strengths and Difficulties Questionnaire: A research note. Journal of Child Psychology and Psychiatry, 38(5), 581-586.

Putnam, S. P., Gartstein, M. A., & Rothbart, M. K. (2006). Measurement of fine-grained aspects of toddler temperament: The Early Childhood Behavior Questionnaire. Infant Behavior and Development, 29(3), 386-401.

Rothbart, M. K., Ahadi, S. A., Hershey, K. L., & Fisher, P. (2001). Investigations of temperament at three to seven years: The Children's Behavior Questionnaire. Child Development, 72(5), 1394-1408.

Smyke, A. T., Dumitrescu, A., & Zeanah, C. H. (2002). Attachment disturbances in young children. I: The continuum of caretaking casualty. Journal of the American Academy of Child & Adolescent Psychiatry, 41(8), 972-982.

Zeanah, C. H., & Gleason, M. M. (2015). Annual research review: Attachment disorders in early childhood - clinical presentation, causes, correlates, and treatment. Journal of Child Psychology and Psychiatry, 56(3), 207-222.
