# Supplementary material
Source: Research Square preprint supplement (doi:10.21203/rs.3.rs-10239680/v1)
Supplement: Supplementary file 2 [file 4e96f1439b37a9c128ab8c3e.docx]

**Supplementary File 2. Measures and Coding Protocol**

Caregiver Continuity, Temperament, and Attachment Disorders in Chinese Alternative Care

This file provides domain-level measurement, adaptation, and coding information for the main manuscript. It does not reproduce copyrighted scale items verbatim; instead, it documents construct domains, sources, timing, scoring direction, reliability evidence, and coding safeguards.

**S2.1 Measure Adaptation Overview**

The RAD/DSED interview was adapted from the Disturbances of Attachment Interview. The adaptation process included translation, back-translation, expert review, pilot testing with caregivers from multiple care settings, interviewer training, and double coding of a subset of interviews. Outcomes are reported as symptom scores rather than psychiatric diagnoses.

**S2.2 Care Context and Placement History Form**

| **Domain** | **Source** | **Coding / scoring** | **Use in manuscript** |
| --- | --- | --- | --- |
| Care context | Administrative placement record and caregiver interview | Institutional care; family-like group care; foster care; kinship care; low-SES community family | Primary T1 exposure |
| Age at placement | Administrative record | Months from birth to entry into current care context; not structurally defined for community comparison children | Selection covariate |
| Duration in care | Administrative record | Months in current care context at T1 | Selection covariate and robustness control |
| Placement disruptions | Administrative record / caregiver report | Count of placement moves before T1 | Selection covariate |
| Pre-placement adversity | Child record abstraction | Standardized index summarizing documented adversity domains; absence of a record was not treated as proof of absence | Selection covariate |

**S2.3 Caregiver Continuity Index**

| **Indicator block** | **Operational definition** | **Direction** | **Evidence reported** |
| --- | --- | --- | --- |
| Primary-caregiver assignment | Presence of an identifiable adult primarily responsible for daily care | Higher = greater continuity | Included in continuity index |
| Caregiver changes | Number of changes in primary caregiver or shift assignment during the past six months | Reverse coded | Record-report convergence reported in Table 3 |
| Weekly exposure | Average weekly hours with the primary caregiver | Higher = greater continuity | Included in continuity index |
| Distress availability | Whether the same caregiver was available during child distress or illness | Higher = greater continuity | Caregiver report |
| Predictable routines | Consistency of daily caregiving routines across the week | Higher = greater continuity | Caregiver report |

Continuity indicators were standardized and averaged so that higher values reflected more stable access to a familiar caregiver. The manuscript reports internal consistency and record-report convergence in Table 3.

**S2.4 Caregiver Sensitivity Coding Protocol**

| **Episode / dimension** | **Coding focus** | **Scale direction** |
| --- | --- | --- |
| Free play episode | Warmth, responsiveness, support for exploration, affective attunement | Higher = more sensitive |
| Mild frustration / comfort-seeking episode | Promptness, accurate interpretation of distress, non-intrusive comfort, emotional availability | Higher = more sensitive |
| Global sensitivity score | Average of coded dimensions across valid episodes | Higher = more sensitive |
| Quality control | Practice coding, double coding of a subset, blind recoding sensitivity check, discrepancy resolution after reliability estimation | Reliability evidence reported in Table 3 and Supplementary Table S6 |

**S2.5 RAD and DSED Symptom Interview Domains**

| **Outcome** | **Domain-level symptom blocks** | **Score direction** | **Reporting decision** |
| --- | --- | --- | --- |
| RAD symptoms | Limited selective attachment behavior; limited comfort seeking; limited response to comfort; emotional withdrawal; restricted positive affect | Higher = more symptoms; range reported as 0-10 | Reported as symptom score, not diagnosis |
| DSED symptoms | Reduced reticence with unfamiliar adults; overly familiar behavior; diminished checking back; willingness to leave with strangers | Higher = more symptoms; range reported as 0-10 | Reported as symptom score, not diagnosis |
| Stranger-approach task | Approach/leave behavior, checking back, latency where feasible, protocol deviations | Higher disinhibition where coded as DSED-related behavior | Used as convergence evidence and ethically stopped if needed |

**S2.6 Temperament and Socioemotional Adjustment**

| **Construct** | **Domain meaning** | **Timing** | **Role in model** |
| --- | --- | --- | --- |
| Negative emotionality / frustration | Pronounced distress, anger, or frustration under challenge | T1 | Primary susceptibility moderator |
| Effortful control | Attentional focusing, inhibitory control, and regulatory capacity | T1 | Primary susceptibility moderator |
| Perceptual sensitivity | Responsiveness to subtle environmental cues | T1 | Secondary temperament indicator |
| Socioemotional adjustment | Emotional symptoms, conduct problems, peer difficulties, prosocial behavior, and social inhibition | T3 | Secondary outcome / validity evidence |

**S2.7 Missing Data and Validity Notes**

**Missing values were tracked by wave and source.** Child-protection record variables were interpreted conservatively because undocumented adversity was not treated as evidence that adversity did not occur. For measures requiring observation, invalid or stopped tasks were coded as protocol deviations rather than forced scores.
