# Supplementary material
Source: Research Square preprint supplement (doi:10.21203/rs.3.rs-10239680/v1)
Supplement: Supplementary file 3 [file a25d4ddf54ef09973d2501a9.docx]

**Supplementary File 3. Analytic Variable Codebook and Model Specification Guide**

Caregiver Continuity, Temperament, and Attachment Disorders in Chinese Alternative Care.

This file defines analytic variables and model roles used in the main manuscript. It is intended for reviewer interpretation of the reported models and does not contain identifiable child-level data.

**S3.1 Core Variable Codebook**

| **Variable** | **Definition** | **Source** | **Coding / range** | **Model role** |
| --- | --- | --- | --- | --- |
| study_id | Pseudonymous child identifier | Project tracking file | String / numeric code | Record linkage only |
| site_id | Pseudonymous site identifier | Site record | Cluster code | Random/site-cluster adjustment |
| care_type | Care context at T1 | Placement record | 1 institutional; 2 group; 3 foster; 4 kinship; 5 community | Primary exposure |
| age_months | Child age at T1 | Caregiver/report record | Months | Covariate |
| female | Child gender | Caregiver/report record | 0 no; 1 yes | Covariate |
| disability_status | Documented disability or special-care status | Administrative record | 0 no; 1 yes | Covariate |
| entry_age_months | Age at entry into current care context | Administrative record | Months; structurally N/A for community group | Selection covariate |
| duration_care_months | Duration in current care context | Administrative record | Months; structurally N/A for community group | Selection covariate |
| placement_disruptions | Placement moves before T1 | Administrative record / report | Count | Selection covariate |
| pre_adversity_index | Documented pre-placement adversity | Record abstraction | Standardized index | Selection covariate |
| rad_t1 | Baseline RAD symptom score | Structured interview | 0-10, higher = more symptoms | Baseline outcome control |
| dsed_t1 | Baseline DSED symptom score | Structured interview / task evidence | 0-10, higher = more symptoms | Baseline outcome control |
| continuity_t2 | Caregiver continuity index | Records + caregiver report | Standardized composite | Mediator |
| sensitivity_t2 | Caregiver sensitivity score | Observed interaction coding | Higher = more sensitive | Mediator |
| neg_emotionality_t1 | Negative emotionality / frustration | Caregiver-report temperament scale | Standardized score | Moderator |
| effortful_control_t1 | Effortful control | Caregiver-report temperament scale | Standardized score | Moderator |
| rad_t3 | T3 RAD symptom score | Structured interview | 0-10, higher = more symptoms | Primary outcome |
| dsed_t3 | T3 DSED symptom score | Structured interview / task evidence | 0-10, higher = more symptoms | Primary outcome |
| sdq_cbcl_t3 | Socioemotional adjustment score | Screening scale | Higher direction defined by subscale | Secondary outcome |

**S3.2 Primary Model Specifications**

| **Analysis** | **Specification in words** | **Interpretation** |
| --- | --- | --- |
| Primary outcome model | T3 RAD/DSED predicted from care type, corresponding T1 symptom score, child covariates, selection factors, and site clustering | Prospective association, not random-assignment causal effect |
| Mediator model | T2 continuity/sensitivity predicted from T1 care type and baseline covariates | Tests whether care context is associated with proximal caregiving ecology |
| Indirect-pathway model | T1 care type -> T2 continuity/sensitivity -> T3 RAD/DSED with baseline symptom adjustment | Theory-consistent indirect association |
| Moderation model | Interaction between T2 caregiving mechanisms and T1 temperament predicting T3 outcomes | Differential susceptibility only when both risk and benefit sides are supported |
| Robustness models | IPW, entropy balancing, multiple imputation, alternative outcome distribution, alternative-care-only sample, and site sensitivity | Evidence boundaries and selection-bias sensitivity |

**S3.3 Community Comparison Coding Rule**

Placement-specific variables such as age at entry into care, duration in care, and placement disruption are structurally undefined for the low-SES community comparison group. Five-group models therefore interpret care-context indicators and baseline covariates for the whole sample, while placement-specific covariates are substantively interpreted only within alternative-care contexts. Alternative-care-only models provide the child-welfare-system-specific robustness check.

**S3.4 Missing Data and Sensitivity Rules**

Complete-case models are reported as the primary presentation when T3 outcome data are available. Multiple imputation is used as a robustness check for missing covariates and wave-level incompleteness. Attrition patterns are described by care type and incorporated into sensitivity checks where field loss is non-random.
