# Supplementary material
Source: Research Square preprint supplement (doi:10.21203/rs.3.rs-10239680/v1)
Supplement: Supplementary file 4 [file d5727430da7df3183e35e89f.docx]

**Supplementary File 1. Supplementary Methods and Analytic Tables**

When Protection Does Not Attach: Caregiver Continuity, Temperamental Susceptibility, and Attachment Disorder Symptoms among Children in Alternative Care in China

**Supplementary Method S1. Measure Adaptation and Coding Quality**

The RAD/DSED interview was adapted from the Disturbances of Attachment Interview through translation, back-translation, expert review, and pilot testing with caregivers from institutional, foster, kinship, and community settings. Interviewers received standardized training before fieldwork, and a subset of interviews was double-coded to estimate inter-rater reliability. The adaptation retained the distinction between inhibited attachment-related symptoms and socially disinhibited behavior toward unfamiliar adults. Because the study did not conduct a full psychiatric diagnostic interview for every child, the outcomes are reported as symptom scores rather than clinical diagnoses.

Observed caregiver sensitivity was coded from brief caregiver-child interaction tasks. Coders completed practice coding before fieldwork, a subset of recordings was double-coded to estimate reliability, and an additional blind-recoding subset was used to assess whether contextual knowledge affected ratings. Discrepancies were resolved after reliability estimation. These procedures support measurement transparency while protecting child-welfare records and site identities. Additional domain-level measure and coding details are provided in Supplementary File 2, and analytic variable definitions are provided in Supplementary File 3.

**Supplementary Table S1. Conceptual Definitions of Care Contexts**

| **Care context** | **Operational definition** | **Expected relational profile** |
| --- | --- | --- |
| Institutional care | Residential child-welfare or social-welfare institution; paid staff; centralized routines. | Highest risk of caregiver rotation, limited one-to-one comfort, and weaker primary-caregiver assignment. |
| Family-like group care | Small units or group homes designed to approximate family routines under organizational supervision. | Potentially better continuity than institutions, but still vulnerable to shift work and professional distance. |
| Family foster care | Formal placement with approved non-relative foster caregivers. | Potentially high continuity and sensitivity if caregivers receive sufficient training and support. |
| Kinship care | Care by relatives or extended-family members when parents cannot provide care. | Relational familiarity and cultural continuity, but variable economic and caregiving resources. |
| Low-SES community family | Biological-family comparison group with socioeconomic risk but no state placement. | Socioeconomic risk without formal alternative-care exposure; not a normative ideal group. |

*Note. These definitions follow the study terminology used in the main manuscript and are reported to clarify how administrative categories were translated into relational care contexts.*

**Supplementary Table S2. Measurement Plan and Temporal Ordering**

| **Construct** | **Timing** | **Primary source** | **Purpose in model** |
| --- | --- | --- | --- |
| Care type and placement history | T1 | Administrative records and caregiver interview | Distal context and selection controls. |
| Child temperament | T1 | Age-appropriate caregiver-report scale | Susceptibility moderator. |
| Baseline RAD/DSED | T1 | Structured interview and caregiver report | Controls prior symptoms and strengthens temporal inference. |
| Caregiver continuity | T2 | Records plus caregiver report | First mediator: relational stability. |
| Caregiver sensitivity | T2 | Observed interaction coding | Second mediator: emotional responsiveness. |
| RAD/DSED symptoms | T3 | Structured interview plus observation when feasible | Primary outcomes. |
| Socioemotional adjustment | T3 | SDQ/CBCL screening scale | Secondary outcomes and clinical validity. |

*Note. T1-T2-T3 ordering is the minimum requirement for a credible mediation claim. Cross-sectional mediation should not be used as causal evidence.*

**Supplementary Table S3. Hypotheses and Interpretive Safeguards**

| **Hypothesis** | **Core test** | **Interpretive safeguard** |
| --- | --- | --- |
| H1: Care type predicts later RAD/DSED. | T3 symptoms regressed on T1 care type with T1 symptoms and selection covariates. | Use prospective language; do not claim random assignment. |
| H2: Care type predicts continuity and sensitivity. | T2 mediators regressed on T1 care type and baseline covariates. | Use only pre-mediator covariates. |
| H3: Continuity/sensitivity predict later symptoms. | T3 symptoms regressed on T2 mediators, T1 symptoms, care type, and covariates. | Controls baseline symptoms to reduce reverse interpretation. |
| H4: Indirect pathway through continuity and sensitivity. | Bootstrap or Monte Carlo indirect effects under T1-T2-T3 ordering. | Interpret as theory-consistent indirect association, not definitive causation. |
| H5-H6: Temperament moderation and moderated mediation. | Interaction terms and conditional indirect effects. | Differentiate diathesis-stress from full differential susceptibility. |

*Note. The table states how each hypothesis is tested while keeping causal claims proportional to the observational design.*

**Supplementary Table S4. Analytic Model Specifications and Interpretation Rules**

| **Analysis component** | **Model specification** | **Interpretation rule** |
| --- | --- | --- |
| Recruitment and analytic sample flow | Eligible cases, consent, T1/T2/T3 retention, exclusions, and final analytic N by care context. | Use transparent denominators and report attrition rather than smoothing field loss. |
| Baseline characteristics | Group sizes, age, gender, placement history, adversity, baseline RAD/DSED, and caregiver education. | Treat imbalance as expected in non-random placement and address it through adjustment and weighting. |
| Measurement quality | Alpha/omega, ICC/kappa, task convergence, descriptive statistics, and missingness. | Interpret RAD/DSED as symptom scores unless diagnostic procedures support diagnosis. |
| Primary outcome models | Adjusted models predicting T3 RAD and DSED from care type, T1 symptoms, selection factors, and site clustering. | Report prospective associations rather than causal effects of placement. |
| Indirect-pathway models | Temporally ordered paths from T1 care type to T2 continuity/sensitivity to T3 RAD/DSED. | Interpret indirect effects cautiously when confidence intervals include zero. |
| Moderation and moderated mediation | Interaction terms, simple slopes, conditional indirect effects, and indexes of moderated mediation. | Differentiate full differential susceptibility from vulnerability-under-adversity patterns. |
| Robustness analyses | IPW, entropy balancing, imputation, alternative outcome distributions, alternative-care-only sample, and site sensitivity. | Use robustness checks to define evidence boundaries rather than select the most favorable model. |

*Note. These specifications clarify how the main and supplementary analyses are interpreted while keeping causal claims proportional to the observational design.*

**Supplementary Table S5. Expanded Indirect-Effect Interpretation for Care-Type Contrasts**

| **Contrast** | **Continuity pathway** | **Sensitivity pathway** | **Interpretation** |
| --- | --- | --- | --- |
| Family-like group care vs institutional care | Indirect effects were not supported; confidence intervals included zero. | Indirect effects were not supported; confidence intervals included zero. | Family-like group care was not interpreted as reliably protective unless it changed proximal caregiving ecology. |
| Foster care vs institutional care | RAD: -0.33, 95% CI [-0.52, -0.16]; DSED: -0.23, 95% CI [-0.40, -0.08]. | RAD: -0.25, 95% CI [-0.42, -0.11]; DSED: -0.13, 95% CI [-0.27, 0.01]. | Continuity was the more robust mechanism; sensitivity was stronger for RAD than DSED. |
| Kinship care vs institutional care | RAD: -0.21, 95% CI [-0.38, -0.07]; DSED: -0.15, 95% CI [-0.29, -0.02]. | RAD: -0.16, 95% CI [-0.30, -0.04]; DSED: -0.08, 95% CI [-0.20, 0.04]. | Kinship pathways were meaningful but somewhat less stable than foster-care pathways. |
| Low-SES community family vs institutional care | Not estimated as a substantive alternative-care mechanism. | Not estimated as a substantive alternative-care mechanism. | Community comparisons served as socioeconomic benchmarks and were supplemented by alternative-care-only models. |

*Note. Values are reported only where the manuscript provides estimable contrast-level indirect effects. Community-family comparisons are retained as contextual benchmarks rather than treated as policy-intervention contrasts.*

**Supplementary Table S6. Robustness and Sensitivity Checks**

| **Check** | **Purpose** | **Result** | **Interpretation** |
| --- | --- | --- | --- |
| Inverse-probability weighting | Reduce observed selection imbalance across care types. | Foster (RAD): b = -1.09, 95% CI [-1.71, -0.47]; Kinship (RAD): b = -0.61, 95% CI [-1.24, 0.02]; SMD after weighting = 0.19. | Estimates attenuated but direction remained consistent. |
| Entropy balancing / matching | Alternative balance method. | Matched N = 575; Foster (RAD): b = -1.15, 95% CI [-1.79, -0.51]; Kinship (RAD): b = -0.73, 95% CI [-1.42, -0.04]. | Alternative balance method yielded a similar direction. |
| Multiple imputation | Assess missing-data sensitivity. | Imputed m = 40; Foster (RAD): b = -1.18, 95% CI [-1.88, -0.48]; Kinship (RAD): b = -0.82, 95% CI [-1.58, -0.06]. | Results broadly aligned with the complete-case model. |
| Alternative outcome distribution | Check skewness/zero inflation of RAD/DSED. | Negative binomial IRR for Foster RAD = 0.78, 95% CI [0.67, 0.91]; Kinship RAD = 0.83, 95% CI [0.71, 0.97]. | Alternative distribution supported a similar substantive conclusion. |
| Exclude recent placements | Avoid unstable early-placement adjustment period. | Excluding placements <6 months (N = 42), Foster (RAD): b = -1.31, 95% CI [-1.95, -0.67]; Kinship (RAD): b = -0.92, 95% CI [-1.62, -0.22]. | Results were stable after excluding early placements. |
| Alternative care-only sample | Test whether findings hold without low-SES community comparison. | Foster (RAD): b = -1.05, 95% CI [-1.70, -0.40]; Kinship (RAD): b = -0.59, 95% CI [-1.28, 0.10]; DSED: Foster b = -0.82, 95% CI [-1.50, -0.14]; Kinship b = -0.58, 95% CI [-1.28, 0.12]. | Foster-care contrast remained stable; kinship estimates were weaker. |
| Coder blind-status sensitivity | Assess whether non-blind coding affects results. | Subset of 20% recoded blind: ICC for sensitivity = 0.68; RAD outcome association b = -0.32, p = .018 vs. b = -0.35 in full sample. | Blind recoding supported acceptable reliability. |
| Outlier/influential-site check | Detect site-driven findings. | Leave-one-site-out range: Foster (RAD) b from -1.15 to -1.32; Kinship (RAD) b from -0.78 to -0.95. | No single site drove the primary pattern. |

*Note. These checks clarify the boundary conditions of the main findings and are not used to select the most statistically favorable model.*

**Supplementary File Structure**

The submission package separates the main manuscript from supporting materials to keep the article readable while giving reviewers enough methodological detail. Supplementary File 1 contains conceptual definitions, temporal ordering, interpretation safeguards, expanded indirect-pathway evidence, and robustness checks. Supplementary File 2 reports domain-level measures and coding protocols. Supplementary File 3 provides the analytic variable codebook and model-specification guide.
