# Supplementary material
Source: Research Square preprint supplement (doi:10.21203/rs.3.rs-10239680/v1)
Supplement: Supplementary file 5 [file fc7893189d1ddecc39bb56cd.docx]

**Submission File Checklist and Recommended Upload Package**

This checklist is for the author team and should not be uploaded as a manuscript file unless the target journal asks for a cover note or file inventory.

| **File** | **Upload?** | **Purpose** | **Notes** |
| --- | --- | --- | --- |
| Main manuscript | Yes | Article text, main tables, Figure 1 | Use anonymized version for double-blind journals. |
| Supplementary File 1: Methods and Analytic Tables | Yes | Conceptual definitions, temporal ordering, interpretation safeguards, expanded indirect effects, robustness checks | Upload as online supplementary material. |
| Supplementary File 2: Measures and Coding Protocol | Yes, if journal permits supplements | Domain-level measurement, interview adaptation, observational coding, scoring rules | Does not reproduce copyrighted full scale items. |
| Supplementary File 3: Analytic Variable Codebook | Yes, if journal permits supplements | Variable definitions, model roles, coding rules, missing-data rules | Does not include child-level data. |
| Figure 1 image file | Yes | Separate high-resolution conceptual model | Upload TIFF/PNG if journal requires separate figure files. |
| Raw identifiable data | No | Protected child-welfare records | Do not upload publicly; use controlled-access language only. |
| Executable code | Only if requested | Model reproducibility | Can be provided under restricted review if permitted by ethics/data agreement. |

Recommended submission order: main manuscript, supplementary file 1, supplementary file 2, supplementary file 3, separate Figure 1 file, title page/ethics form as required by the journal.
